# Supplementary material for: From waste to resource: a multidimensional analysis of sewage sludge thermochemical treatment efficiency across temperatures
Source: Royal Society of Chemistry journal article supplement (doi:10.1039/d4ew00255e), 2024-01-01
Supplement: d4ew00255e1.xlsx [file d4ew00255e1.xlsx]

## Sheet: A-Life cycle inventory
Sheet A-Life cycle inventory of thermochemical treatment scenarios for 1 tonne sewage sludge
			SS-to-TH	SS-to-MPC	SS-to-HPC	SS-to-GI	SS-to-I	Scenario 1
Raw materials	Sludge(80%wc)	tonne	1	1	1	1	1	1
	Water	m3	0.24	0.184	0.0411429	0.0284842	0.9252	0.11179
	Electricity	kWh	32	73.7143	55.7143	77.9825	90	75.96
	Natural gas	Nm3	40		51.4286	9.82456	25.2
	Sulfuric acid	tonne					0.0001836	0.0057
	Biomass	tonne		0.07				0.0392
	Quartz sand	tonne					0.0024
	Lime	tonne		4.38e-05	0.00014		0.00132	2.4528e-05
	Slaked lime	tonne				0.00201754
	PAC	tonne		0.05				0.00044
	NaClO	tonne					1.2e-05
	Sodium hydroxide	tonne					0.0043272
	Urea	tonne			3e-05	0.00347368	0.00162
	Block activated carbon	tonne				0.000473684
	Activated carbon powder	tonne			0.000342857	0.00114035	0.00042
		tonne
Flue gas emissions	Dust	tonne	9.6e-06	0.000135616	2.34286e-05	3.26842e-05	1.173e-05	7.59452e-05
	SO2	tonne	4e-06	2.32877e-05	1.82857e-05	5.42105e-05	1.26e-07	6.5151e-11
	NOx	tonne	2.52632e-05	4.79452e-05	6.28571e-05	0.00054193	9.546e-07	2.68493e-05
	NO2	tonne	2.52e-05	2.42009e-05
	HCl	tonne			3.34286e-05	2.64912e-05	7.68e-06
	Fluoride	tonne			1.11429e-05
	CO	tonne		0.0037825	0.0037825	0.00694737	2.88e-05	0.000708728
	CO2	tonne	0.230573	0.07245	0.176246	0.113456	0.110732	0.142198
	Methane	tonne		0.000914304	0.000914304			2.411e-05
	NH3	tonne	4.56e-06	5.47945e-06	3.04857e-05	5e-05	3.36e-07	0.00021
	H2S	tonne	1.09781e-06	7.76256e-06	9.14286e-07	2.80702e-06	6e-09	0.00173875
	Trimethylamine	tonne	7.26027e-08
	Cu	tonne			8.57143e-09		2.592e-08
	Zn	tonne			4.57143e-09		3.672e-08
	Ni	tonne			8.57143e-09		2.028e-08
	Ta	tonne					1.0212e-10
	Sn	tonne					2.004e-09
	Ti	tonne					5.112e-10
	Mn	tonne					2.484e-08
	V	tonne					8.172e-09
	Co	tonne					8.268e-10
	Be	tonne			1.28571e-08		1.332e-09
	Hg	tonne			1.14286e-08	7.01754e-08	3.672e-13
	Cd	tonne			5.71429e-11	1.05263e-07	2.04e-14
	As	tonne			1e-07		7.356e-09
	Cr	tonne			2e-08		1.536e-08
	Pb	tonne			6.28571e-08		1.476e-08
	Dioxins	tonne			1.44e-13	6.73684e-13	1.92e-13
Water emissions	COD	tonne	0.050003	0.000248539	1.25143e-05	0.000145263	0.00230534	0.000139182
	BOD5	tonne	0.0150016	5.93607e-06			0.00115098	3.3242e-06
	TN	tonne	0.005				0.000229632
	TP	tonne					1.7718e-05
	SS	tonne	1.788e-06	5.05936e-05	0.00150786		0.00058842	2.83324e-05
	NH3-N	tonne	0.00250013	3.88128e-05	1.25714e-06	9.82456e-06	0.00014379	2.17352e-05
Solid waste	Hazardous waste	tonne		4.56621e-05		0.164184	0.0399403	2.55708e-05
Product	Biochar	tonne	0.21	0.15	0.133			0.084
	Road base material	tonne						0.088
Components and experimental analysis of SS
		SS	OS
Moisture		0.057	0.8
Ash		0.2697	0.0764415
Volatile matter		0.5467	0.0983526
Fixed carbon		0.1266	0.0252059
C		0.320933	0.0638974
H		0.037	0.00967286
O			0.035373
S		0.0071	0.00235349
N			0.0122617
Organic matter		0.4	0.731
Organic/inorganic separation	tonne	1	0.56
Biochar(650℃)	tonne	0.07796	0.08556

## Sheet: B-Life-cycle assessment
Sheet B-Characterization analysis of 5 SS thermochemical treatment technologies by LCA method
	GWP	PED	ADP	WU	AP	EP	RI	ODP	POFP	IRP	ET	HT-cancer	HT-non cancer
SS-to-TH	263.49	4137.21	0.000725768	342.432	0.129611	4.02867	0.0486955	5.63319e-08	0.0128732	0.8037	0.187935	2.86161e-08	2.78299e-06
Direct emissions	231	0	0	0	0.0323508	4.02989	0.00558406	0	0.000324324	0	0	0	0
Water	0.0457197	0.60178	0	244.533	0.000240393	2.47275e-05	7.37448e-05	1.00178e-10	1.82867e-05	0.00115937	0	0	0
Electricity	30.0854	398.903	1.74657e-05	99.9514	0.158459	0.0103635	0.0462566	5.49025e-08	0.0116206	0.799273	0.086779	4.75846e-09	9.33789e-09
Fuel	2.40142	3738.27	0.000708286	1.58849	0.0019522	0.000173374	0.000911803	1.40755e-09	0.000926421	0.00439144	0.101068	2.38525e-08	2.77364e-06
Biochar	-0.0424006	-0.561263	0	-3.64091	-0.0633909	-0.0117747	-0.00413073	-7.83328e-11	-1.64245e-05	-0.00112427	0	0	0
SS-to-MPC	169.632	1239.32	0.000174608	610.973	0.553611	0.0577908	0.20767	2.8454e-07	0.0692263	2.18814	1.16039	2.20721e-07	2.32748e-05
Direct emissions	72.5	0	0	0	0.0986612	0.029573	0.0329892	0	0.0260892	0	0	0	0
Water	0.0350518	0.461365	0	187.475	0.000184302	1.89577e-05	5.65377e-05	7.68029e-11	1.40198e-05	0.000888847	0	0	0
Electricity	69.2905	918.724	4.02257e-05	230.201	0.364951	0.0238685	0.106535	1.26447e-07	0.0267638	1.84083	0.199863	1.09593e-08	2.15063e-08
Fuel	1.24448	11.8807	1.95476e-06	1.43822	0.00408759	0.000495127	0.00147681	3.7118e-08	0.00221004	0.0331378	0.769981	1.96999e-07	2.321e-05
Fly ash	0.00922219	0.0767934	0	0	0	1.74849e-05	1.56415e-05	0	5.52666e-06	0	0.000884943	2.35794e-10	2.77933e-08
Chemical materials	26.5827	308.58	0.000132371	194.433	0.13099	0.0122283	0.0695477	1.20896e-07	0.0141555	0.314001	0.188842	1.24815e-08	1.54074e-08
Biochar	-0.0302862	-0.400902	0	-2.60065	-0.0452792	-0.00841051	-0.00295052	-5.5952e-11	-1.17318e-05	-0.000803046	0	0	0
SS-to-HPC	231.62	5500.4	0.000940851	223.644	0.390582	0.0306858	0.0963349	9.75892e-08	0.0229589	1.39991	1.47749	1.71709e-07	1.74547e-05
Direct emissions	176	0	0	0	0.15078	0.0195428	0.01678	0	0.00148378	0	1.14983	1.20899e-07	1.24728e-05
Water	0.0078295	0.103055	0	41.8762	4.11674e-05	4.23458e-06	1.26288e-05	0	0	0.000198541	0	0	0
Electricity	52.3674	694.341	3.04012e-05	173.978	0.275818	0.018039	0.0805153	9.55646e-08	0.0202272	1.39123	0.15105	8.28269e-09	1.62538e-08
Fuel	3.08582	4803.67	0.000910147	2.04122	0.00250857	0.000222785	0.00117167	1.8087e-09	0.00119045	0.005643	0.129872	3.06504e-08	3.56413e-06
Chemical materials	0.184545	2.61381	3.09555e-07	8.04747	0.00158043	0.000334083	0.000469667	2.47973e-10	6.47794e-05	0.00350041	0.0468032	1.18707e-08	1.40143e-06
Biochar	-0.0268537	-0.355467	0	-2.30591	-0.0401476	-0.00745732	-0.00261613	-4.96108e-11	-1.04022e-05	-0.000712035	0	0	0
SS-to-GI	233.813	2443.88	0.000263909	998.76	1.11421	0.14585	0.255356	1.72569e-07	0.358404	2.35373	2.02759	6.5572e-07	7.55778e-05
Direct emissions	136	0	0	0	0.556203	0.0943906	0.0914735	0	0.32137	0	1.2688	5.37634e-07	6.33876e-05
Water	0.00624836	0.0822432	0	33.4195	3.28538e-05	0	1.00785e-05	0	0	0.000158447	0	0	0
Electricity	84.4272	1119.42	4.90131e-05	280.489	0.444675	0.0290826	0.129808	1.5407e-07	0.0326104	2.24296	0.243524	1.33534e-08	2.62045e-08
Fuel	0.6784	1056.06	0.000200091	0.44875	0.000551496	4.89781e-05	0.000257584	3.97633e-10	0.000261714	0.00124058	0.0285516	6.73833e-09	7.83554e-07
Fly ash	0.375345	3.12551	1.1106e-06	0.525136	0.000645193	0.000711638	0.000636612	8.97939e-10	0.000224936	0.00219685	0.0360174	9.59688e-09	1.13119e-06
Chemical materials	12.3257	265.188	1.36888e-05	683.878	0.112101	0.0216127	0.033171	1.71901e-08	0.00393433	0.10717	0.450661	8.83955e-08	1.02493e-05
SS-to-I	306.37	3748.91	0.000548687	1569.93	0.557452	0.315333	0.171141	1.84619e-07	0.0591184	2.35152	3.0258	2.6723e-07	3.02509e-05
Direct emissions	199	0	0	0	0.00756418	0.258895	0.00196801	0	1.02162e-05	0	1.78592	3.98831e-09	8.99993e-07
Water	0.176211	2.31936	1.65481e-07	942.47	0.000926516	9.53039e-05	0.000284225	3.86102e-10	7.048e-05	0.00446839	0.000975447	5.73746e-11	0
Electricity	84.6152	1121.92	4.91223e-05	281.113	0.445666	0.0291474	0.130097	1.54413e-07	0.032683	2.24796	0.244066	1.33832e-08	2.62628e-08
Fuel	8.05175	67.0472	2.38241e-05	11.265	0.0138404	0.0152658	0.0136564	1.92622e-08	0.00482525	0.047126	0.772631	2.05869e-07	2.42659e-05
Fly ash	0.178852	28.0425	1.312e-06	1.67463	0.00237472	0.001098	0.000383329	8.9151e-10	0.000189072	0.00408908	0.0903808	2.29209e-08	2.68591e-06
Chemical materials	14.348	2529.59	0.000474233	332.929	0.0870806	0.0108288	0.024752	9.64915e-09	0.0213373	0.0477656	0.131014	2.09732e-08	2.37154e-06
S	224.472	1027.85	0.000401992	392.702	4.17099	0.109274	0.199447	1.64511e-07	0.0438347	1.93828	0.667421	1.23134e-07	1.30385e-05
Direct emissions	142	0	0	0	3.68476	0.087203	0.0407299	0	0	0	0	0	0
Water	0.0213359	0.280831	0	114.115	0.000112184	1.15395e-05	3.44143e-05	4.67496e-11	8.5338e-06	0.000541037	0	0	0
Electricity	71.4529	947.395	4.1481e-05	237.385	0.37634	0.0246134	0.109859	1.30393e-07	0.027599	1.89827	0.2061	1.13013e-08	2.21775e-08
Fuel	0.696911	6.65317	1.09467e-06	0.805404	0.00228905	0.000277271	0.000827015	2.07861e-08	0.00123762	0.0185572	0.431189	1.10319e-07	1.29976e-05
Fly ash	0.00516604	0	0	0	0	9.79458e-06	8.76197e-06	0	0	0	0	1.32086e-10	1.55691e-08
Chemical materials	10.5604	76.9767	0.000359547	46.8043	0.134138	0.0019552	0.0500196	1.37606e-08	0.0150889	0.0278941	0.0305577	1.43451e-09	2.6606e-09
Products	-0.264822	-3.50549	-1.56802e-07	-6.41605	-0.0266593	-0.00479592	-0.00203301	-4.57911e-10	-0.000102583	-0.00702184	-0.000975226	-5.6575e-11	0
Sheet B-Normalization analysis of 5 SS thermochemical treatment technologies by LCA method
	GWP	PED	ADP	WU	AP	EP	RI	ODP	POFP	IRP	ET	HT-cancer	HT-non cancer
SS-to-TH	0.860036	0.752166	0.771395	0.21812	0.116326	0.999699	0.190664	0.197975	0.0359182	0.341458	0.0621106	0.0436408	0.0368228
Direct emissions	0.753985	0	0	0	0.0290348	1	0.0218291	0	0.000904912	0	0	0	0
Water	0.000128838	0.000109407	0	0.155761	0.000215753	6.13603e-06	0.000249334	0.000352069	5.10226e-05	0.000492566	0	0	0
Electricity	0.0981812	0.0725226	0.0185637	0.0636664	0.142217	0.00257167	0.181113	0.192952	0.0324233	0.339578	0.0286797	0.00725684	0.000123553
Fuel	0.00781806	0.679636	0.752814	0.00101183	0.00175209	4.3022e-05	0.00353138	0.00494676	0.00258485	0.00186574	0.0334019	0.036376	0.0366991
Biochar	-0.000118004	-0.00010204	0	-0.00231916	-0.0568932	-0.00292185	-0.0161375	-0.000275296	-4.58267e-05	-0.000477653	0	0	0
SS-to-MPC	0.553673	0.225315	0.185585	0.389174	0.496865	0.0143406	0.813248	1	0.193152	0.92965	0.3835	0.336609	0.307958
Direct emissions	0.236626	0	0	0	0.0885482	0.00733842	0.129154	0	0.0727927	0	0	0	0
Water	9.4017e-05	8.38784e-05	0	0.119417	0.00016541	4.70429e-06	0.000181946	0.000269919	3.91173e-05	0.000377634	0	0	0
Electricity	0.22615	0.167029	0.0427546	0.146632	0.327543	0.00592287	0.417177	0.444392	0.0746749	0.78209	0.0660529	0.0167134	0.000284559
Fuel	0.00404172	0.00215996	0.00207765	0.000916108	0.0036686	0.000122864	0.0057441	0.130449	0.00616633	0.0140789	0.254472	0.300431	0.307101
Waste management	9.70685e-06	1.39614e-05	0	0	0	4.3388e-06	2.17862e-05	0	1.54202e-05	0	0.000292466	0.000359596	0.000367744
Chemical materials	0.0867481	0.0561014	0.140693	0.123849	0.117564	0.0030344	0.272327	0.424883	0.0394959	0.133406	0.0624105	0.0190349	0.000203861
Biochar	-7.84616e-05	-7.28861e-05	0	-0.00165654	-0.040638	-0.00208704	-0.0115155	-0.00019664	-3.27334e-05	-0.000341181	0	0	0
SS-to-HPC	0.756008	1	1	0.142455	0.350546	0.00761455	0.377232	0.342972	0.0640588	0.594764	0.488297	0.261864	0.230949
Direct emissions	0.57446	0	0	0	0.135325	0.00484947	0.0656752	0	0.00413997	0	0.380008	0.184376	0.165033
Water	5.16099e-06	1.87359e-05	0	0.026674	3.69476e-05	1.05079e-06	9.98778e-06	0	0	8.43519e-05	0	0	0
Electricity	0.170912	0.126235	0.0323125	0.110819	0.247546	0.00447631	0.315279	0.335856	0.0564368	0.591078	0.0499206	0.0126314	0.00021506
Fuel	0.010052	0.873332	0.967366	0.0013002	0.00225144	5.52832e-05	0.00454907	0.00635659	0.00332153	0.00239748	0.0429215	0.0467432	0.0471584
Waste management
Chemical materials	0.000581976	0.000475203	0.000329016	0.00512602	0.00141843	8.29013e-05	0.00179986	0.000871488	0.000180744	0.00148718	0.015468	0.0181033	0.0185429
Biochar	-6.72578e-05	-6.46256e-05	0	-0.0014688	-0.0360324	-0.0018505	-0.0102059	-0.000174354	-2.90236e-05	-0.000302514	0	0	0
SS-to-GI	0.763167	0.44431	0.2805	0.636183	1	0.0361921	1	0.606485	1	1	0.670101	1	1
Direct emissions	0.443896	0	0	0	0.499191	0.0234227	0.358194	0	0.89667	0	0.419328	0.819914	0.838706
Water	0	1.49522e-05	0	0.0212873	2.94862e-05	0	0	0	0	6.73173e-05	0	0	0
Electricity	0.275558	0.203517	0.0520945	0.178664	0.399095	0.00721674	0.508319	0.54147	0.0909878	0.95294	0.0804823	0.0203645	0.000346721
Fuel	0.00219397	0.191997	0.21267	0.000285842	0.000494966	1.21537e-05	0.000969295	0.00139746	0.00073022	0.000527072	0.00943604	0.0102762	0.0103675
Waste management	0.00120477	0.000568233	0.00118042	0.000334498	0.000579059	0.00017659	0.00245366	0.00315576	0.000627606	0.000933351	0.0119034	0.0146356	0.0149673
Chemical materials	0.0402117	0.0482125	0.0145494	0.435612	0.10061	0.00536312	0.129867	0.0604137	0.0109773	0.045532	0.14894	0.134807	0.135612
Biochar	GWP	PED	ADP	WU	AP	EP	RI	ODP	POFP	IRP	ET	HT-cancer	HT-non cancer
SS-to-Incineration	1	0.681571	0.583182	1	0.500312	0.0782486	0.67019	0.648833	0.164949	0.999063	1	0.407537	0.400261
Direct emissions	0.649534	0	0	0	0.00678884	0.0642438	0.00766776	0	2.85047e-05	0	0.590229	0.00608233	0.0119082
Water	0.000554775	0.000421671	0.000175884	0.600328	0.000831546	2.36493e-05	0.00107363	0.00135693	0.00019665	0.00189843	0.000322376	8.74986e-05	0
Electricity	0.276172	0.20397	0.0522105	0.179062	0.399984	0.00723281	0.509452	0.542676	0.0911905	0.955063	0.0806616	0.0204099	0.000347494
Fuel	0.0262613	0.0121895	0.0253219	0.00717551	0.0124218	0.00378814	0.0534423	0.0676961	0.0134632	0.0200219	0.255348	0.313958	0.321072
Waste management	0.000563393	0.00509827	0.00139448	0.00106669	0.00213131	0.000272465	0.00146174	0.00313316	0.000527539	0.00173728	0.02987	0.0349552	0.0355383
Chemical materials	0.0468128	0.459892	0.504046	0.212067	0.0781546	0.00268712	0.0968955	0.0339114	0.0595342	0.0202936	0.043299	0.031985	0.0313788

## Sheet: C-Energy efficiency analysis
Sheet C---Energy efficiency analysis
		SS-to-TH	SS-to-MPC	SS-to-HPC	SS-to-GI	SS-to-I	Scenario 1
Fuel	MJ	1424	1170.4	1830.86	349.754	897.12	655.424
Sludge	MJ	1650	1650	1650	1650	1650	1650
Biomass		864.146	925.87	820.938			712.92
Combustible gas	MJ		355.122	975.181	975.181		374.088
Flue gas waste heat recovery	MJ		512.622	1211.42	7647.25	1458.37	286.491
Energy recovery	MJ		849.989	1211.42	926.422	1458.37	641.875
Energy utilization	MJ	864.146	925.87	820.938			712.92
Energy consumption	MJ	2209.85	1309.91	1448.5	1073.33	1088.75	1099.24

## Sheet: D-Cost-benefit analysis
Sheet D-Cost-benefit analysis
	SS-to-TH	SS-to-MPC	SS-to-HPC	SS-to-GI	SS-to-I	Scenario 1
1.Total investment	-12.9137	-12.4098	-21.5446	-25.0585	-27.9051	-17.9828
2.Operating cost	-99.404	-125.439	-96.5063	-89.7766	-169.47	-71.5638
Raw material cost	-30	-35.0918	-0.19	-34.1351	-20.88	-1.79638
Energy consumption cost	-69.404	-90.3472	-96.3163	-55.6415	-100.66	-69.7674
3.Resource income	417.2	398	392.56	350	352.4	376.88
Sludge Subsidy	350	350	350	350	350	350
By-product income	46.2	33	29.26			18.48
Solid waste resale income				4.06	2.4
4.Handling cost	-37.1918	-18.1	-51.7143	-32.9091	-21.72	-18.1
5.Maintenance cost	-0.15819	-0.15202	-0.26392	-0.30697	-0.34184	-0.217366
6.Residual value	0.13559	0.1303	0.22622	0.26311	0.293	0.186314
Full life cycle（year)	30	30	30	30	30	30
Discount rate (%)	0.06	0.06	0.06	0.06	0.06	0.06
Discount factor	0.174	0.174	0.174	0.174	0.174	0.174
PVsum	13.764	13.764	13.764	13.764	13.764	13.764
CBA	106.121	97.3859	84.3365	79.094	45.9029	109.838
Sheet D-Externality costs
Summarizing of Extern-cost
		Environmental protection tax	Unit
SS-to-TH		532.365	yuan
SS-to-MPC		10.2193	yuan
SS-to-HPC		16.7348	yuan
SS-to-GI		24.4569	yuan
SS-to-I		33.0795	yuan
Scenario 1		52.9623	yuan
Emissions to air	discount rate	Unit price for externality cost (CNY/t)				SS-to-TH		SS-to-MPC		SS-to-HPC		SS-to-GI		SS-to-I		Scenario 1
		minimum	maximum	average
		(CNY/t)				emission amount (t)	extern-cost (CNY)	emission amount (t)	extern-cost (CNY)	emission amount (t)	extern-cost (CNY)	emission amount (t)	extern-cost (CNY)	emission amount (t)	extern-cost (CNY)	emission amount (t)	extern-cost (CNY)
CO2	0.04			50	50	0.230573	11.5287	0.07245	3.6225	0.176246	8.81229	0.113456	5.6728	0.110732	5.5366	0.142198	7.10988
dust	0.04	550.459	5504.59	3027.52	3274.57	9.6e-06	0.0314359	0.000135616	0.444085	2.34286e-05	0.0767185	3.26842e-05	0.107027	1.173e-05	0.0384107	7.59452e-05	0.248688
NH3	0.04	132	1320	726	785.242	4.56e-06	0.0035807	5.47945e-06	0.00430269	3.04857e-05	0.0239387	5e-05	0.0392621	3.36e-07	0.000263841	0.00021	0.164901
CO	0.04			395.21	427.459		0	0.0037825	1.61686	0.0037825	1.61686	0.00694737	2.96971	2.88e-05	0.0123108	0.000708728	0.302952
NOx	0.04	1263.16	12631.6	6947.37	7514.27	2.52632e-05	0.189834	4.79452e-05	0.360273	6.28571e-05	0.472326	0.00054193	4.07221	9.546e-07	0.00717313	2.68493e-05	0.201753
Pb	0.04	60000	600000	330000	356928		0		0	6.28571e-08	0.0224355	1.53509e-07	0.0547916	1.476e-08	0.00526826		0
As	0.04			1.63886e+06	1.63886e+06		0		0	1e-07	0.163886	1.53509e-07	0.251579	7.356e-09	0.0120554		0
Hg	0.04	12000000	120000000	66000000	7.13856e+07		0		0	1.14286e-08	0.815835	7.01754e-08	5.00952	3.672e-13	2.62128e-05		0
dioxins	0.04			3.81201e+12	3.81201e+12		0		0	1.44e-13	0.548929	6.73684e-13	2.56809	1.92e-13	0.731906		0
Cd	0.04	40000	400000	220000	237952		0		0	5.71429e-11	1.35973e-05	1.05263e-07	0.0250476	2.04e-14	4.85422e-09		0
Cr	0.04	1714290	17142860	9428575	1.01979e+07		0		0	2e-08	0.203959	1.53509e-07	1.56547	1.536e-08	0.15664		0
Ni	0.04	9230.77	92307.7	50769.2	54912		0		0	4.57143e-09	0.000251026	1.53509e-07	0.00842947	2.028e-08	0.00111362		0
HCl	0.04	111.628	1116.28	613.953	664.052		0		0	3.34286e-05	0.0221983	2.64912e-05	0.0175916	7.68e-06	0.00509992		0
SO2	0.04	1263.16	12631.6	6947.37	7514.27	4e-06	0.0300571	2.32877e-05	0.17499	1.82857e-05	0.137404	5.42105e-05	0.407353	1.26e-07	0.000946798	6.5151e-11	4.89562e-07
H2S	0.04	4140	41380	22760	24617.2	1.09781e-06	0.027025	7.76256e-06	0.191093	9.14286e-07	0.0225072	2.80702e-06	0.069101	6e-09	0.000147703	0.00173875	42.8032
HF	0.04	1379.31	13793.1	7586.21	8205.24		0		0	1.11429e-05	0.0914298		0		0		0
Trimethylamine	0.04	384	3840	2112		7.26027e-08	0		0		0		0		0		0
Emissions to water
NH3-N	0.04	7000	70000	38500	41641.6	0.00250013	104.11	3.88128e-05	1.61623	1.25714e-06	0.0523494	9.82456e-06	0.40911	0.00014379	5.98765	2.17352e-05	0.905087
COD	0.04	1400	14000	7700	8328.32	0.050003	416.441	0.000248539	2.06991	1.25143e-05	0.104223	0.000145263	1.2098	0.00230534	19.1996	0.000139182	1.15915
Suspended solids（SS）	0.04	350	4000	2175	2352.48	1.788e-06	0.00420623	5.05936e-05	0.11902	0.00150786	3.5472		0	0.00058842	1.38425	2.83324e-05	0.0666515
Human health							0.224851		2.42552		3.94515		16.6711		0.965168		0.918293
Climate change							11.5287		3.6225		8.81229		5.6728		5.5366		7.10988
Unclassified*							0.0570821		0.366082		0.273539		0.494045		0.00619442		42.8032
Water quality							520.555		3.80516		3.70378		1.61891		26.5715		2.13089
Total extern-cost							532.59		10.2193		16.7348		24.4569		33.0795		52.9623
Notes:
1. Discount rates (3%-5%) was refered to the case study of environmental performance in Enropean Commission, 2014. (Huysegoms et al., 2018)
Contribution of environmental emissions within four categories to externality costs. (Note: Unclassified * represents externality costs of the remaining unclassified emissions).
Unit: yuan
		Human health	Climate change	Unclassified*	Water quality
SS-to-TH		0.224851	11.5287	0.0570821	520.555
SS-to-MPC		2.42552	3.6225	0.366082	3.80516
SS-to-HPC		3.94515	8.81229	0.273539	3.70378
SS-to-GI		16.6711	5.6728	0.494045	1.61891
SS-to-I		0.965168	5.5366	0.00619442	26.5715
Scenario 1		0.918293	7.10988	42.8032	2.13089
Data Source:
SS-to-TH: https://qh.sz.gov.cn/attachment/0/263/263637/4385066.pdf; SS-to-MPC: https://wenku.baidu.com/view/7e75eb8d87254b35eefdc8d376eeaeaad1f31686.html?_wkts_=1725000590529&bdQuery=%E5%AE%89%E5%BE%BD%E6%97%A0%E4%B8%BA%E6%B1%A1%E6%B3%A5%E7%82%AD%E5%8C%96%E9%A1%B9%E7%9B%AE&needWelcomeRecommand=1; https://www.docin.com/p-2108624562.html; SS-to-HPC: http://www.jimo.gov.cn/zwgk/bmxxgk/cxjs/zdgk/gggs…

## Sheet: E-Sensitivity analysis-LCA
Sheet E---Sensitivity analysis
	GWP	PED	ADP	WU	AP	EP	RI	ODP	POFP	IRP	ET	HT-cancer	HT-non cancer
SS-to-TH
Direct emissions	0.0438347	0	0	0	0.0124799	0.0500151	0.00573366	0	0.00125968	0	0	0	0
Water	8.67579e-06	7.27277e-06	0	0.0357053	9.27362e-05	3.06894e-07	7.57205e-05	8.89175e-05	7.1026e-05	7.21268e-05	0	0	0
Electricity	0.00570902	0.00482092	0.00120326	0.0145944	0.0611284	0.000128622	0.0474958	0.0487313	0.0451348	0.0497246	0.0230876	0.00831428	0.000167767
Fuel	0.000455694	0.0451786	0.0487956	0.000231943	0.000753096	2.15175e-06	0.00093623	0.00124934	0.00359824	0.000273202	0.026889	0.0416766	0.0498321
Products	-8.04596e-06	-6.78311e-06	0	-0.000531625	-0.0244542	-0.000146136	-0.00424139	-6.9528e-05	-6.37931e-05	-6.99431e-05	0	0	0
SS-to-MPC
Direct emissions	0.0213698	0	0	0	0.0089107	0.0255862	0.00794269	0	0.0188434	0	0	0	0
Water	1.03317e-05	1.86136e-05	0	0.0153423	1.66454e-05	1.6402e-05	1.36124e-05	1.3496e-05	1.01261e-05	2.03105e-05	0	0	0
Electricity	0.0204238	0.0370656	0.0115189	0.0188388	0.0329609	0.0206508	0.02565	0.0222196	0.0193306	0.0420637	0.00861185	0.00248261	4.62009e-05
Fuel	0.000366819	0.000479321	0.000559758	0.000117699	0.000369175	0.000428379	0.000355567	0.00652245	0.00159624	0.000757214	0.0331775	0.0446262	0.0498608
Waste management	2.7183e-06	3.0982e-06	0	0	0	1.51277e-05	3.76595e-06	0	3.99174e-06	0	3.81311e-05	5.34145e-05	5.97068e-05
Chemical materials	0.00783542	0.0124496	0.0379052	0.0159118	0.0118305	0.0105798	0.0167448	0.0212441	0.0102241	0.00717507	0.00813697	0.00282744	3.30988e-05
Products	-8.92703e-06	-1.61743e-05	0	-0.000212828	-0.00408944	-0.00727668	-0.000710387	-9.83201e-06	-8.47349e-06	-1.835e-05	0	0	0
SS-to-HPC
Direct emissions	0.0379933	0	0	0	0.019302	0.0318434	0.0087092	0	0.00323138	0	0.0389115	0.0352047	0.0357292
Water	1.69016e-06	9.36794e-07	0	0.00936225	5.27001e-06	6.89991e-06	6.55463e-06	0	0	7.0912e-06	0	0	0
Electricity	0.0113046	0.00631174	0.00161562	0.0388962	0.0353086	0.0293931	0.0417893	0.0489627	0.0440507	0.0496901	0.0051117	0.00241183	4.65599e-05
Fuel	0.000666139	0.0436666	0.0483683	0.000456354	0.000321133	0.000363011	0.000608122	0.000926692	0.00259256	0.000201549	0.00439501	0.0089251	0.0102097
Chemical materials	3.98379e-05	2.37602e-05	1.64508e-05	0.00179917	0.000202318	0.000544361	0.000243768	0.00012705	0.000141076	0.000125023	0.00158387	0.00345663	0.0040145
Products	-5.79694e-06	-3.23128e-06	0	-0.000515531	-0.00513946	-0.0121511	-0.00135783	-2.54182e-05	-2.26538e-05	-2.54314e-05	0	0	0
SS-to-GI
Direct emissions	0.0290831	0	0	0	0.0249595	0.0323588	0.017911	0	0.0448335	0	0.0312884	0.0409957	0.0419353
Water	1.33619e-06	1.68264e-06	0	0.00167305	1.47431e-06	0	1.97341e-06	0	0	3.36587e-06	0	0	0
Electricity	0.0180544	0.0229026	0.00928598	0.0140418	0.0199548	0.00997005	0.0254169	0.04464	0.00454939	0.047647	0.00600524	0.00101822	1.73361e-05
Fuel	0.000145073	0.0216062	0.037909	2.24654e-05	2.47483e-05	1.67906e-05	5.04363e-05	0.00011521	3.6511e-05	2.63536e-05	0.000704076	0.000513811	0.000518375
Waste management	8.02661e-05	6.39456e-05	0.000210413	2.62894e-05	2.8953e-05	0.000243962	0.000124652	0.000260168	3.13803e-05	4.66675e-05	0.000888182	0.000731782	0.000748363
Chemical materials	0.0026358	0.00542556	0.00259348	0.0342363	0.00503051	0.00740924	0.00649505	0.00498064	0.000548867	0.0022766	0.0111132	0.00674033	0.00678062
SS-to-I
Direct emissions	0.0324771	0	0	0	0.00067846	0.041051	0.00057497	0	8.64046e-06	0	0.0295114	0.00074623	0.00148755
Water	2.87579e-05	3.09338e-05	1.50797e-05	0.0300164	8.31027e-05	1.51116e-05	8.30385e-05	0.000104567	5.96092e-05	9.50106e-05	1.61188e-05	1.07351e-05	0
Electricity	0.0138093	0.0149632	0.00447635	0.00895308	0.0399735	0.00462168	0.0380087	0.0418194	0.027642	0.0477979	0.00403308	0.00250405	4.34084e-05
Fuel	0.00131406	0.000894221	0.00217101	0.000358776	0.0012414	0.00242058	0.00398981	0.00521675	0.004081	0.00100203	0.0127674	0.038519	0.0401078
Waste management	2.91888e-05	0.000374009	0.000119558	5.33347e-05	0.000212998	0.000174102	0.000111992	0.000241446	0.00015991	8.69454e-05	0.0014935	0.0042886	0.00443939
Chemical materials	0.00234161	0.0337376	0.0432152	0.0106034	0.00781059	0.00171704	0.00723148	0.00261326	0.0180462	0.00101563	0.00216495	0.00392418	0.00391979
Scenario 1
Direct emissions	0.0316298	0	0	0	0.0441713	0.039901	0.0102107	0	0	0	0	0	0
Water	4.75245e-06	1.36611e-05	0	0.0145295	1.34481e-06	5.28006e-06	8.62744e-06	1.42087e-05	9.73408e-06	1.39566e-05	0	0	0
Electricity	0.0159158	0.0460864	0.00515944	0.0302245	0.0045114	0.0112622	0.027541	0.0396306	0.0314808	0.0489681	0.0154401	0.00458904	8.50462e-05
Fuel	0.000155233	0.000323646	0.000136155	0.000102546	2.74401e-05	0.000126869	0.000207327	0.00631753	0.00141169	0.000478703	0.0323027	0.0447965	0.0498432
Waste management	1.15071e-06	0	0	0	0	4.48165e-06	2.19657e-06	0	0	0	0	5.36352e-05	5.97044e-05
Chemical materials	0.00235228	0.00374456	0.0447207	0.00595925	0.00160798	0.000894629	0.0125396	0.00418228	0.0172111	0.00071956	0.00228924	0.000582499	1.02029e-05
Products	-5.89878e-05	-0.000170526	-1.95031e-05	-0.000816911	-0.00031958	-0.00219444	-0.000509664	-0.000139173	-0.000117011	-0.000181136	-7.30594e-05	-2.29729e-05	0

## Sheet: F-Uncertainty analysis-LCA
Sheet F---Uncertainty analysis
	SS-to-TH	SS-to-MPC	SS-to-HPC	SS-to-GI	SS-to-I	Scenario 1
GWP	0.2848	0.1885	0.2536	0.1546	0.1507	0.2723
PED	0.2389	0.2359	0.2844	0.1518	0.1492	0.3775
ADP	0.4809	0.1736	0.2302	0.1826	0.1748	0.3237
WU	0.3532	0.1859	0.2718	0.1649	0.1639	0.288
AP	0.1095	0.1647	0.1976	0.1423	0.139	0.2982
EP	0.1165	0.1874	0.2723	0.0975	0.0932	0.2673
RI	0.0766	0.1429	0.2171	0.1333	0.1242	0.2134
ODP	0.1461	0.1925	0.2692	0.1558	0.1421	0.301
POFP	0.1023	0.1576	0.2023	0.1449	0.1312	0.2949
IRP	0.1287	0.2025	0.2098	0.1686	0.1655	0.2974
ET	0.1064	0.1739	0.2142	0.0613	0.0574	0.2015
HT-cancer	0.1482	0.2989	0.3154	0.1057	0.1657	0.3389
HT-non cancer	0.1483	0.3235	0.3172	0.1273	0.1779	0.3625

## Sheet: G-ECER
Sheet F---Analysis of energy saving and emission reduction indicators
	PED	CO2	IWU	COD	NH3-N	SO2	NOx	ECER
SS-to-TH	3.28e-11	2.84e-11	2.57e-12	2.25e-09	1.09e-09	5.4e-12	5.61e-12	1.01e-08
SS-to-MPC	9.84e-12	1.77e-11	4.59e-12	1.26e-11	1.7e-11	1.63e-11	1.73e-11	3.59e-10
SS-to-HPC	4.37e-11	2.46e-11	1.68e-12	9.85e-13	5.98e-13	9.99e-12	1.08e-11	4.95e-10
SS-to-GI	1.94e-11	2.47e-11	7.5e-12	9e-12	7.1e-12	1.87e-11	4.22e-11	5.06e-10
SS-to-I	2.98e-11	3.24e-11	1.18e-11	1.05e-10	6.38e-11	1.66e-11	1.36e-11	1e-09
Scenario 1	8.16e-12	2.39e-11	2.95e-12	6.62e-12	9.52e-12	1.57e-11	1.23e-11	3.21e-10
